# Supplementary material for: Gene expression and single nucleotide polymorphism of ATP7B are associated with platinum-based chemotherapy response in non-small cell lung cancer patients
Source: PubMed Central journal article supplement — J Cancer. 2018 Sep 8;9(19):3532–9. doi: 10.7150/jca.26286 (PMC6171024; doi:10.7150/jca.26286), 2018-09-08
Supplement: jcav09p3532s1.pdf [file jcav09p3532s1.pdf]

Supplement Table 1. Association between *ATP7B* SNPs and chemotherapeutic response in 158 NSCLC patients treated with platinum-based chemotherapy.

| SNP        | Additive            |          | Dominant            |          | Recessive            |          |
|------------|---------------------|----------|---------------------|----------|----------------------|----------|
|            | OR(95%CI)           | <i>p</i> | OR(95%CI)           | <i>p</i> | OR(95%CI)            | <i>p</i> |
| rs9563084  | 1.092 (0.700-1.704) | 0.697    | 1.087 (0.514-2.298) | 0.827    | 1.182 (0.558-2.505)  | 0.662    |
| rs2277448  | 1.011 (0.636-1.609) | 0.962    | 1.120 (0.545-2.299) | 0.758    | 0.889 (0.384-2.058)  | 0.784    |
| rs73184328 | 1.126 (0.667-1.902) | 0.656    | 1.009 (0.511-1.992) | 0.980    | 1.841 (0.525-6.454)  | 0.340    |
| rs1801243  | 1.307 (0.816-2.093) | 0.265    | 1.545 (0.721-3.310) | 0.263    | 1.357 (0.605-3.047)  | 0.459    |
| rs1801244  | 0.880 (0.545-1.420) | 0.600    | 0.936 (0.436-2.009) | 0.865    | 0.744 (0.331-1.677)  | 0.476    |
| rs2147363  | 0.829 (0.514-1.337) | 0.442    | 0.945 (0.439-2.034) | 0.886    | 0.628 (0.282-1.396)  | 0.253    |
| rs1061472  | 0.873 (0.525-1.452) | 0.601    | 0.914 (0.449-1.860) | 0.804    | 0.709 (0.263-1.917)  | 0.498    |
| rs732774   | 0.907 (0.549-1.500) | 0.703    | 0.928 (0.466-1.844) | 0.830    | 0.792 (0.288-2.179)  | 0.651    |
| rs1801249  | 0.899 (0.546-1.476) | 0.671    | 0.918 (0.457-1.844) | 0.809    | 0.784 (0.299- 2.059) | 0.622    |
| rs2282057  | 0.784 (0.460-1.334) | 0.369    | 0.704 (0.332-1.492) | 0.359    | 0.788 (0.289-2.151)  | 0.642    |
| rs1051332  | 0.934 (0.553-1.577) | 0.798    | 0.909 (0.462-1.790) | 0.782    | 0.946 (0.296-3.024)  | 0.925    |
| rs928169   | 0.908 (0.542-1.521) | 0.715    | 0.910 (0.447-1.854) | 0.795    | 0.834 (0.302-2.305)  | 0.726    |
| rs9535793  | 0.921 (0.561-1.512) | 0.746    | 0.917 (0.452-1.859) | 0.810    | 0.868 (0.338-2.224)  | 0.767    |
| rs2031992  | 0.967 (0.577-1.619) | 0.897    | 0.921 (0.469-1.810) | 0.811    | 1.070 (0.344-3.323)  | 0.907    |

CR: complete response; PR: partial response; SD: stable disease; PD: progressing disease; SNP: single nucleotide polymorphism; OR: odd ratio; CI: confidence interval.

Supplement Table 2. Level of ATP7B protein expression according to genotypes.

| SNP        | Genotypes | ATP7B (+) | ATP7B (-) | <i>p</i> value |
|------------|-----------|-----------|-----------|----------------|
|            |           | n (%)     | n (%)     |                |
| rs9563084  | GG        | 36 (29.0) | 26 (26.3) | 0.866          |
|            | GA        | 56 (45.2) | 48 (48.5) |                |
|            | AA        | 32 (25.8) | 25 (25.2) |                |
| rs2277448  | TT        | 40 (32.0) | 31 (31.3) | 0.822          |
|            | TG        | 59 (47.2) | 44 (44.4) |                |
|            | GG        | 26 (20.8) | 24 (24.3) |                |
| rs73184328 | GG        | 54 (43.5) | 57 (55.3) | 0.203          |
|            | GA        | 59 (47.6) | 38 (36.9) |                |
|            | AA        | 11 (8.9)  | 8 (7.8)   |                |
| rs1801243  | CC        | 34 (27.4) | 34 (33.3) | 0.575          |
|            | CA        | 58 (46.8) | 46 (45.1) |                |
|            | AA        | 32 (25.8) | 22 (21.6) |                |
| rs1801244  | GG        | 24 (20.0) | 26 (25.2) | 0.285          |
|            | GC        | 61 (50.8) | 56 (54.4) |                |
|            | CC        | 35 (29.2) | 21 (20.4) |                |
| rs2147363  | GG        | 24 (19.4) | 22 (22.2) | 0.716          |
|            | GT        | 63 (50.8) | 52 (52.5) |                |
|            | TT        | 37 (29.8) | 25 (25.3) |                |
| rs1061472  | TT        | 50 (40.0) | 32 (31.7) | 0.346          |
|            | TC        | 62 (49.6) | 54 (53.5) |                |
|            | CC        | 13 (10.4) | 15 (14.8) |                |
| rs732774   | CC        | 54 (42.2) | 35 (34.3) | 0.367          |
|            | CT        | 61 (47.7) | 52 (51.0) |                |
|            | TT        | 13 (10.1) | 15 (14.7) |                |
| rs1801249  | AA        | 51 (41.1) | 34 (33.3) | 0.167          |
|            | AG        | 61 (49.2) | 50 (49.0) |                |
|            | GG        | 12 (9.7)  | 18 (17.7) |                |
| rs2282057  | GG        | 49 (40.5) | 30 (32.6) | 0.486          |
|            | GA        | 58 (47.9) | 49 (53.3) |                |
|            | AA        | 14 (11.6) | 13 (14.1) |                |
| rs1051332  | CC        | 64 (50.0) | 41 (40.6) | 0.250          |
|            | CT        | 54 (42.2) | 47 (46.5) |                |
|            | TT        | 10 (7.8)  | 13 (12.9) |                |
| rs928169   | CC        | 13 (10.6) | 16 (15.8) | 0.229          |
|            | CG        | 60 (48.8) | 54 (53.5) |                |
|            | GG        | 50 (40.6) | 31 (30.7) |                |
| rs9535793  | AA        | 49 (38.9) | 30 (29.4) | 0.234          |
|            | AG        | 63 (50.0) | 55 (53.9) |                |
|            | GG        | 14 (11.1) | 17 (16.7) |                |
| rs2031992  | TT        | 60 (47.2) | 37 (36.3) | 0.148          |
|            | TC        | 58 (45.7) | 52 (51.0) |                |
|            | CC        | 9 (7.1)   | 13 (12.7) |                |
